# Supplementary material for: Controlling the Emission Properties of Quantum Rods via Multiscale 3D Ordered Organization
Source: Hindawi journal article supplement (doi:10.1155/2021/1790976), 2021-11-24
Supplement: f1 [file 1790976.f1.docx]

Supporting Information

Controlling the emission properties of quantum rods via multiscale 3D ordered organization

Thomas Bizien,*a,b,c* Marie Postic,*a,b* Pascale Even-Hernandez,*b* Pascal Panizza,*a* Cristelle Mériadec,*a* Florian Meneau,*a,c* Elsa Mazari-Arrighi,*d†* Christophe Dupuis,*d‡* Charlie Gosse,*d§* Mircea Cotlet, *f* Oleg Gang, *f,g* Valérie Marchi, *b** Franck Artzner *a**

*a Université de Rennes 1, CNRS UMR 6251, Institut de Physique de Rennes, Avenue du Géné- ral Leclerc, 35042 Rennes, France*

*b Université de Rennes 1, CNRS UMR 6226, Institut des Sciences Chimiques de Rennes, Ave- nue du Général Leclerc, 35042 Rennes, France*

*c Synchrotron Soleil, L'Orme des Merisiers, Saint-Aubin - BP 48, 91192 Gif-sur-Yvette CE- DEX, France*

*d Laboratoire de Photonique et de Nanostructures, LPN-CNRS, Route de Nozay, 91460 Mar- coussis, France*

*e Laboratorio Nacional de Luz Síncrotron, CEP 13083-970, Caixa Postal 6192, Campinas, Sao Paulo, Brazil*

*f Center for Functional Nanomaterials, Brookhaven National Laboratory, Upton, New York 11973, USA*

*g Department of Chemical Engineering and Department of Applied Physics and Applied Math ematics, Columbia University, New York, New York 10027, USA*

*† Present address: CYTO / PCV / BIG / DRF / CEA, Unité de Thérapie Cellulaire, Institut Universitaire d'Hématologie, Hôpital Saint Louis, 1 avenue Claude Vellefaux, 75010 Paris, France.*

*‡ Present address: Centre de Nanosciences et de Nanotechnologies, UMR 9001 CNRS / Université Paris-Saclay, 10 boulevard Thomas Gobert, 91120 Palaiseau, France.*

*§ Present address: Institut de Biologie de l’Ecole Normale Supérieure, ENS, CNRS, INSERM, PSL Research University, 46 rue d’Ulm, 75005 Paris, France.,[[1]](#footnote-1)**

§ Present address: Institut de Biologie de l’Ecole Normale Supérieure, ENS, CNRS, INSERM, PSL Research University, 46 rue d’Ulm, 75005 Paris, France.

**Chemicals**

We purchased cadmium oxide (CdO, 99.998%), selenium (Se, 99.5%), and hexylphosphonic acid (HPA, 99%) from Alfa Aesar; sulfur (S, 99%) from Strem Chemical; trioctylphosphineoxide (TOPO, 99%), trioctylphosphine (TOP, 97%), octadecylphosphonic acid (ODPA, 97%), and tetra-methylammonium hydroxide (TMAOH, 25% w/w in methanol) from Sigma-Aldrich. Peptides were synthetized and purified by HPLC (> 90%) by Polypeptide (Strasbourg, France).

**Synthesis of the CdSe/CdS hydrophobic nanorods**

We adapted the protocol of Carbone et al. to our purpose [[1](#_ENREF_1)]. More precisely, CdSe/CdS nanorods were synthesized in two steps, as follow:

**CdSe seeds preparation**

TOPO (3.0 g), ODPA (0.280 g), and CdO (0.060 g) were mixed in a 25 mL glass flask, heated to 150 °C under vacuum for 1 hour. Then, under argon, the mixture temperature was increased to 320 °C in order to dissociate CdO. When the reddish solution turned clear and colorless, 1.5 g of TOP were injected in the flask and the temperature setting was changed to 350 °C. Upon reaching the latter temperature, 0.058 g of Se dissolved in 0.360 g of TOP were added. After 30 s the solution turned orangish and the heating mantel was removed to allow the flask to cool down to room temperature. The obtained solution of CdSe seeds was finally supplemented with 3 mL of TOP and stored until further use.

**CdS shell growth**

*18 nm long QRs.*CdO (0.031 g), TOPO (1.552 g), ODPA (0.150 g), and HPA (0.0414 g) were mixed in a flask and heated at 150 °C under vacuum for 1 h. Under argon the solution was next heated up to 350 °C to dissociate CdO. When it turned clear and colorless, 1.5 g of TOP were added and the temperature was increased to 350 °C. Once this new temperature setting was achieved, we injected quickly a solution which has been prepared by diluting 0.0621 g of sulphur in 0.775 g of TOP containing 200 μL of CdSe seeds at 400 μM. The reaction was allowed to proceed for 10 min and was eventually halted by thermal quenching.

*40 nm long QRs.*CdO (0.0455 g), TOPO (1.555 g), ODPA (0.18 g), and HPA (0.04 g) were mixed in a flask and heated at 150 °C under vacuum for 1 h. Under argon the solution was next heated up to 350 °C to dissociate CdO. When it turned clear and colorless, 1.5 g of TOP were added and the temperature was increased to 350 °C. Once this new temperature setting was achieved, we injected quickly a solution which has been prepared by diluting 0.03 g of sulphur in 0.775 g of TOP containing 200 μL of CdSe seeds at 400 μM. The reaction was allowed to proceed for 10 min and was eventually halted by thermal quenching.

After both syntheses, the resulting fluorescent suspension was dissolved in 5 mL of toluene and washed 3 times with 50 mL of a methanol/toluene mixture (5:1), relying on cycles including centrifugation for 10 min at 3000 g, supernatant removal, and pellet redispersion in fresh solvent. Once the excess of ligands removed, 3 mL of pure toluene was used for the last redispersion before final storage (typically at ~ 50 μM). The obtained samples were named and .

**Peptide grafting and obtention of the hydrophilic CdSe/CdS nanorods**

Just before functionalization the hydrophobic QRs were washed 3 more times with the methanol/toluene mixture, as it has been done before storage. The goal of this extra step is to remove all possible ligands remaining in solution. The final redispersion was achieved in chloroform so as to obtain 30 μL aliquots at 10 mg/mL. The latter organic suspension was next mixed with 90 μL of TCCPAC at 20 mM in water. This addition was followed by the one of 5 μL of TMAOH at 25 % (w/w) in methanol. Transfer of the fluorescent particles from the organic phase to the aqueous one was observed. After a15 min incubation, chloroform was allowed to evaporate under a hood at room temperature for 0.5 h and then removed gently under low vacuum (60 mbar), still at room temperature, for 0.5 h. Finally, ligands in excess were removed by size exclusion chromatography using Sephadex G-25 columns (NAP-5 or NAP-10, GE Healthcare). Both column equilibration and elution were performed with ultra-pure water. The obtained samples were named and , depending on the length of the QRs.

**Transmission electron microscopy**

Samples for size histograms were prepared by depositing onto Formvar-carbon coated copper grids (Agar Scientific) 1.5 µL of or at ~ 0.1 nM, and letting the organic solvent evaporate at ambient pressure and temperature. Images were acquired on a JEM-1400 (JEOL) operating at 120 kV.

**UV–Vis absorption spectroscopy**

Measurements were achieved using a Cary 100 SCAN UV-Vis spectrometer (Varian) and 1 cm long quartz cuvettes. Concentrations in s were calculated based on UV-Vis absorptions at 350 nm and extinction coefficients [[2](#_ENREF_2)a], the latter parameters being estimated relying on the average volume, , of the nanoparticles assimilated to a cylinder. More specifically, the extinction coefficient is related to by the following empirical law, ε350 = 0.38 × 1026 V (M-1.cm-1) where V is the particle volume in cm3, given in the reference [[2](#_ENREF_2)b]. Thus, the calculated extinction coefficients for and are respectively = 1.93× 109 M-1cm-1 and = 4.29× 109 M-1cm-1.

**Quantum yield determination**

Fluorescence emission spectra were recorded on a Fluorolog–3 fluorimeter (Horiba Jobin-Yvon). All samples were excited at 350 nm, which corresponds to the absorption maxima of s, as previously determined by UV-Vis spectrophotometry. In addition, to avoid inner filter effects concentrations were adjusted to have optical densities at the excitation wavelength between 0.01 and 0.1. The quantum yield of s, ,was determined using the one of Rhodamine 6G dissolved in water as reference, = 0.96. More precisely, we relied on where is the refractive index of the considered solvent, the fluorescence intensity integrated over the whole spectrum, and the optical density at the excitation wavelength; the and *Rh6G* subscripts refer to the measurements on s and on Rhodamine 6G, respectively [[3](#_ENREF_3)].

**Preparation of the supracrystals**

The microstructured PDMS stamp (Sylgard 184,Dow Corning) was cast on a master mold that had been photolithographed in SU8–2025 (Microchem) on a silicon wafer. The elastomer surfacedisplayed 35 µm high and 100 µm large pillars, arranged on asquare lattice of parameter 175 µm.

A droplet of or , at 2.5 µM in ultra-pure water and supplemented withTween 20 at 96.4 µM, was sandwiched in between a flat surface (a silicon wafer or a glass coverslip) and the microstructured stamp. After drying for 12 hat room temperature, the PDMS lid was removed in order to observe the so-called or samples.

**Scanning electron microscopy**

The internal organization of the and supracrystals was investigated by scanning electron microscopy (SEM) using a Magellan 400 L (FEI) equipped with a field emission gun and running at 15 kV acceleration voltage, with a 0.2 nA probe current [[4](#_ENREF_4)]. Samples were prepared on silicon wafers.

**Small angle X-ray scattering**

Suspensions of or at 2.5 µM were first loaded into round glass capillaries, 1.3 to 1.6 mm in diameter and ~ 100 mm in length (Glas Technik & Konstruktion Müller & Müller OHG). Then, they were allowed to dry under vacuum at 150 mbar during one week, in the presence of P2O5. It yielded samples than we called and , respectively. Preparation of the control sample in which Tween 20 at 96.4 µM was added to at 2.5 µM was achieved in the same way.

Measurements were performed on the high brilliance SWING beamline at the Soleil synchrotron facility (Saint-Aubin, France), with a monochromator set at 12 KeV and a 80 × 400 µm² (FWHM) beam size [[5](#_ENREF_5)]. Using a CCD detector at 1.2 m from the capillary, diffraction patterns were recorded for reciprocal spacing q = 4 π sin(θ )/λ varying between 0.01 and 0.8 Å−1 , that is, repetitive distances d = 2 π/q ranging from 628 to 78 Å. All samples exhibited powder diffraction patterns along the glass capillary (**Fig. S4a**) that could be submitted to circular integration to yield scattered intensity plots (**Fig. S4b**).

**Confocal fluorescence spectromicroscopy**

**Sample preparation**

Measurement on the and samples were simply performed on droplets of suspension at 2.5 µM in ultra-pure water that have been deposited on a glass coverslip and covered with a second similar coverslip. For investigations at the single nanoparticle level, solutions of s were diluted at 2.5 nM in ultra-pure water and spin-coated on a microscope coverslip.

The and samples were prepared as described above, using at glass coverslip as substrate. To obtain the reference and samples a droplet the corresponding suspension at 2.5 µM has been deposited on a glass coverslip and covered with a second similar coverslip.

**Fluorescence measurements**

Fluorescence emission spectra and decay curves were recorded using a confocal inverted microscope (IX81, Olympus) equipped with a large numerical aperture 100× oil immersion objective (N.A. = 1.40). Samples were placed onto a piezoelectric stage allowing positioning over 100 × 100 microns with a nanometer resolution (PI). Illumination was achieved using a femto-second laser operating at λ = 400 nm (BRAND). The laser power was adjusted depending on the type of samples: POWER = 80% of maximum for single particles characterization (i.e. for or ) and POWER = 18% of maximum in the others cases.

Fluorescence emission spectra were recorded using a monochromator/spectrograph (Acton SP2300i, Princeton Instruments) coupled with a CCD camera (PIXIS 100, Princeton Instruments). One measurement could typically be completed within 100 ms. Data were analyzed using the SpectraSuite software (Ocean Optics).

Fluorescence emission decay curves were acquired thanks to the HARDWARE NAME MODEL BRAND working with 3025 channels, each having a 4 ps temporal resolution. One measurement typically took 60 s. Data were treated using the Symphotime 32 software (Picoquant). More precisely, lifetimes were estimated by (i) deconvoluting the measured signal from the instrument response function (150 ps) and (ii) fitting the obtained data with a triexponential model.


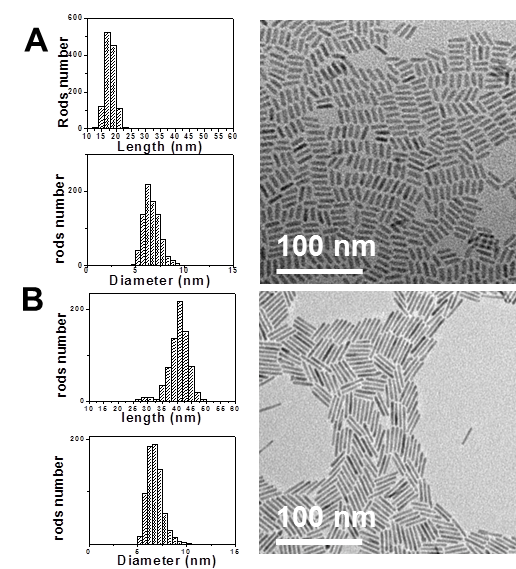

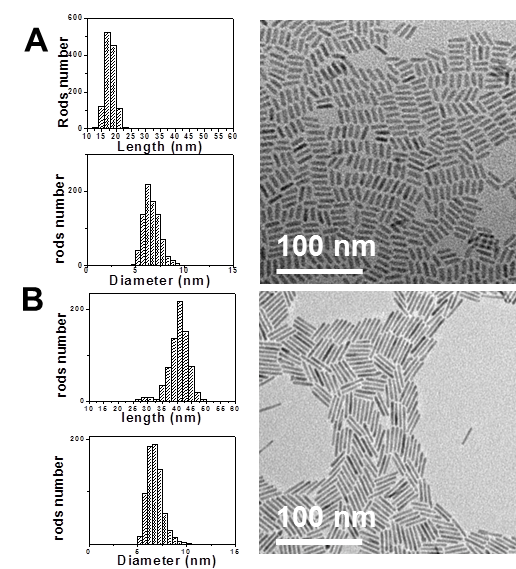


a

b

**Figure S1.** Diameters and lengths of the hydrophobic s measured by transmission electron microscopy (TEM). **(a)** . **(b)** .


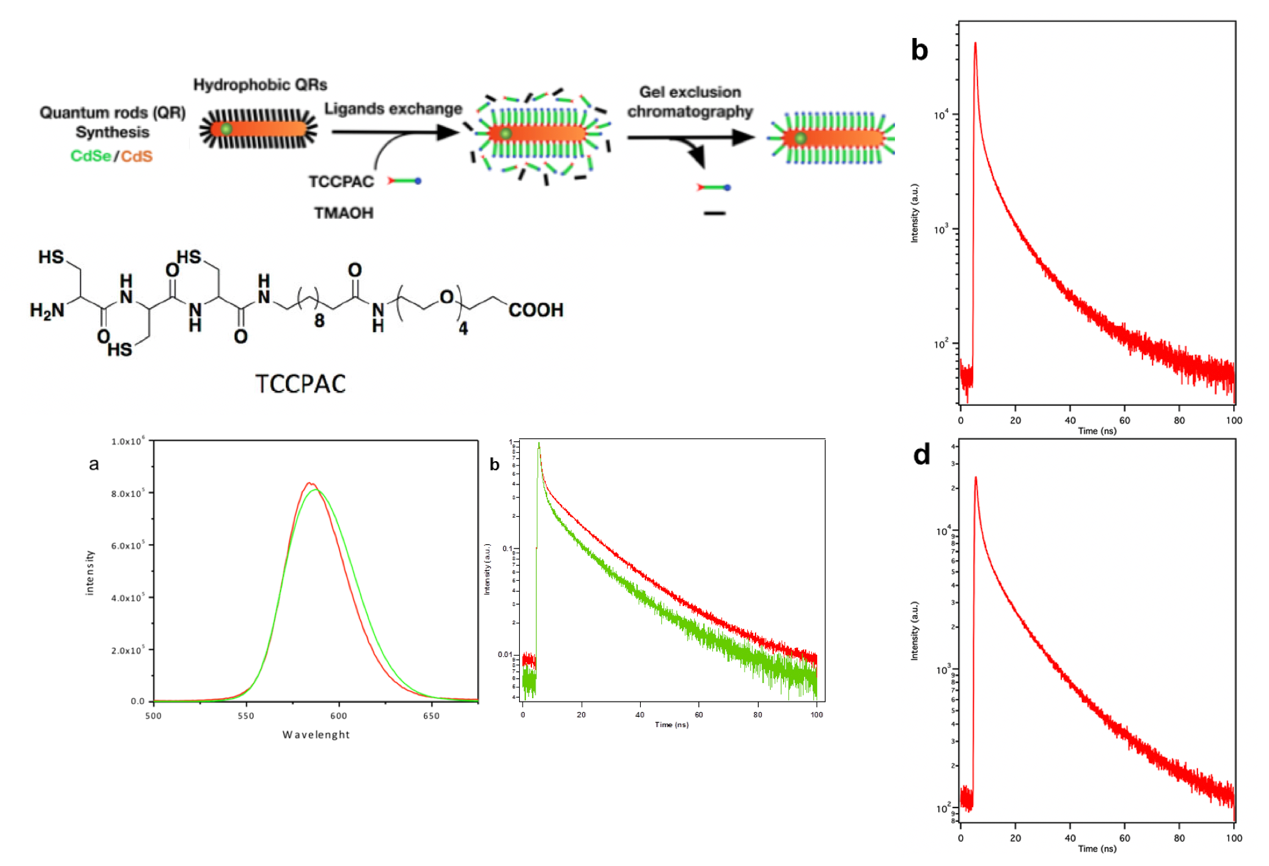


**Figure S2.** Characterization of the fluorescence emission properties of the s dispersed in toluene and in water at 2.5 μM. **(a)** Fluorescence emission spectra for 18 nm long quantum rods (), in toluene (, green) or in water (, red) (exc = 350 nm). **(b)** Corresponding fluorescence emission decay curves, for (green) and for (red). Numerical data associated with the deconvolution in three exponentials of the emission decay curves can be found in **Tab. S1**.


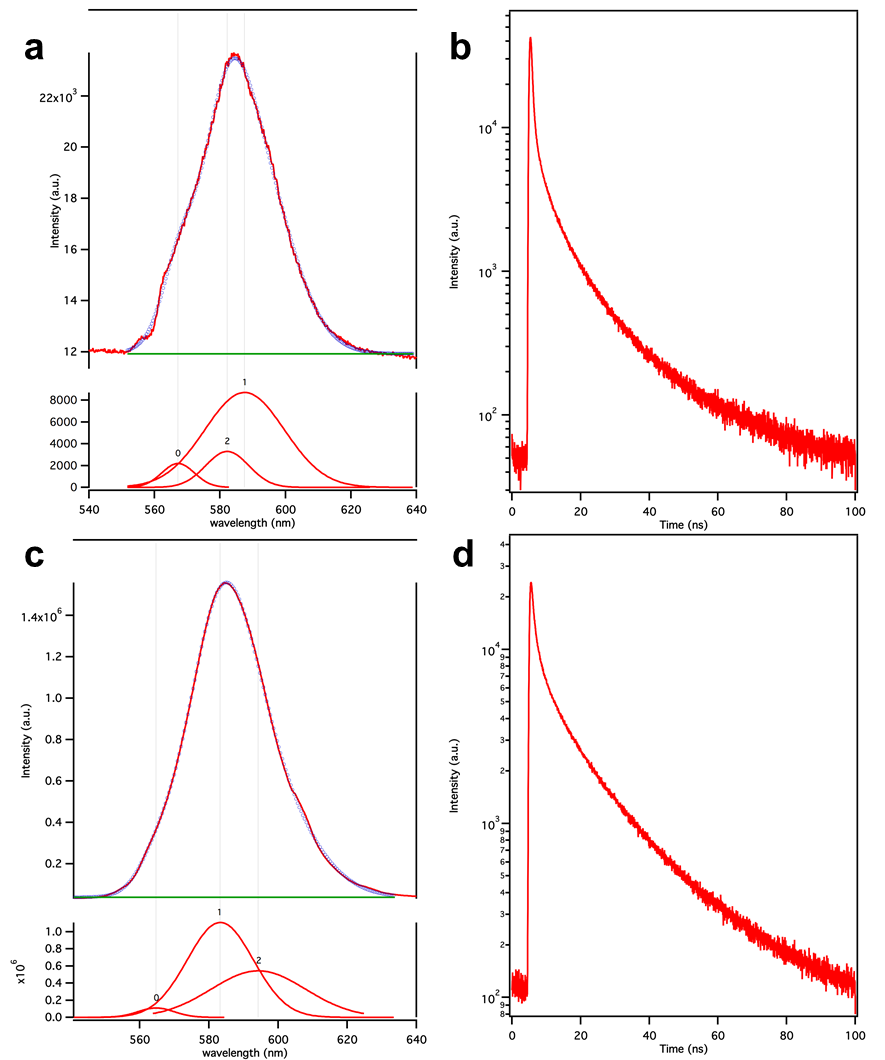

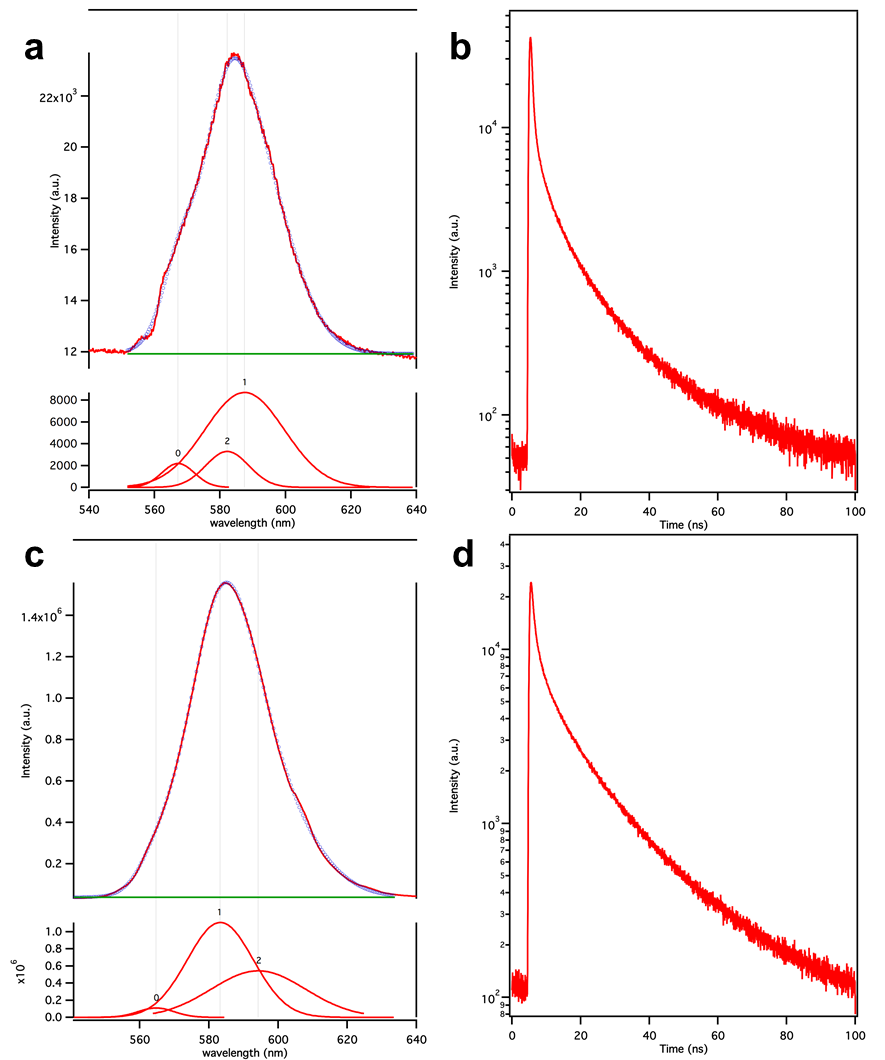


**Figure S3.** Deconvolution of the fluorescence emission spectra of hydrophilics QRs dissolved at 2.5 µM in a drop of water placed over a coverslip. Measurements were performed on the confocal setup and the excitation wavelength was set at = 400 nm. Three Gaussian peaks were used in both cases, which positions and areas are given in **Tab. S2** – the initial spectra are identical to the ones in **Fig. 2**. **(a)** . **(b)** .

**Figure S4.** Detailed SAXS data acquired on . **(a)** Typical powder diffraction pattern. **(b)** Typical scattered intensity plots obtained along the capillary (the lowest spectra correspond to the lowest position along the vertical axis).

**
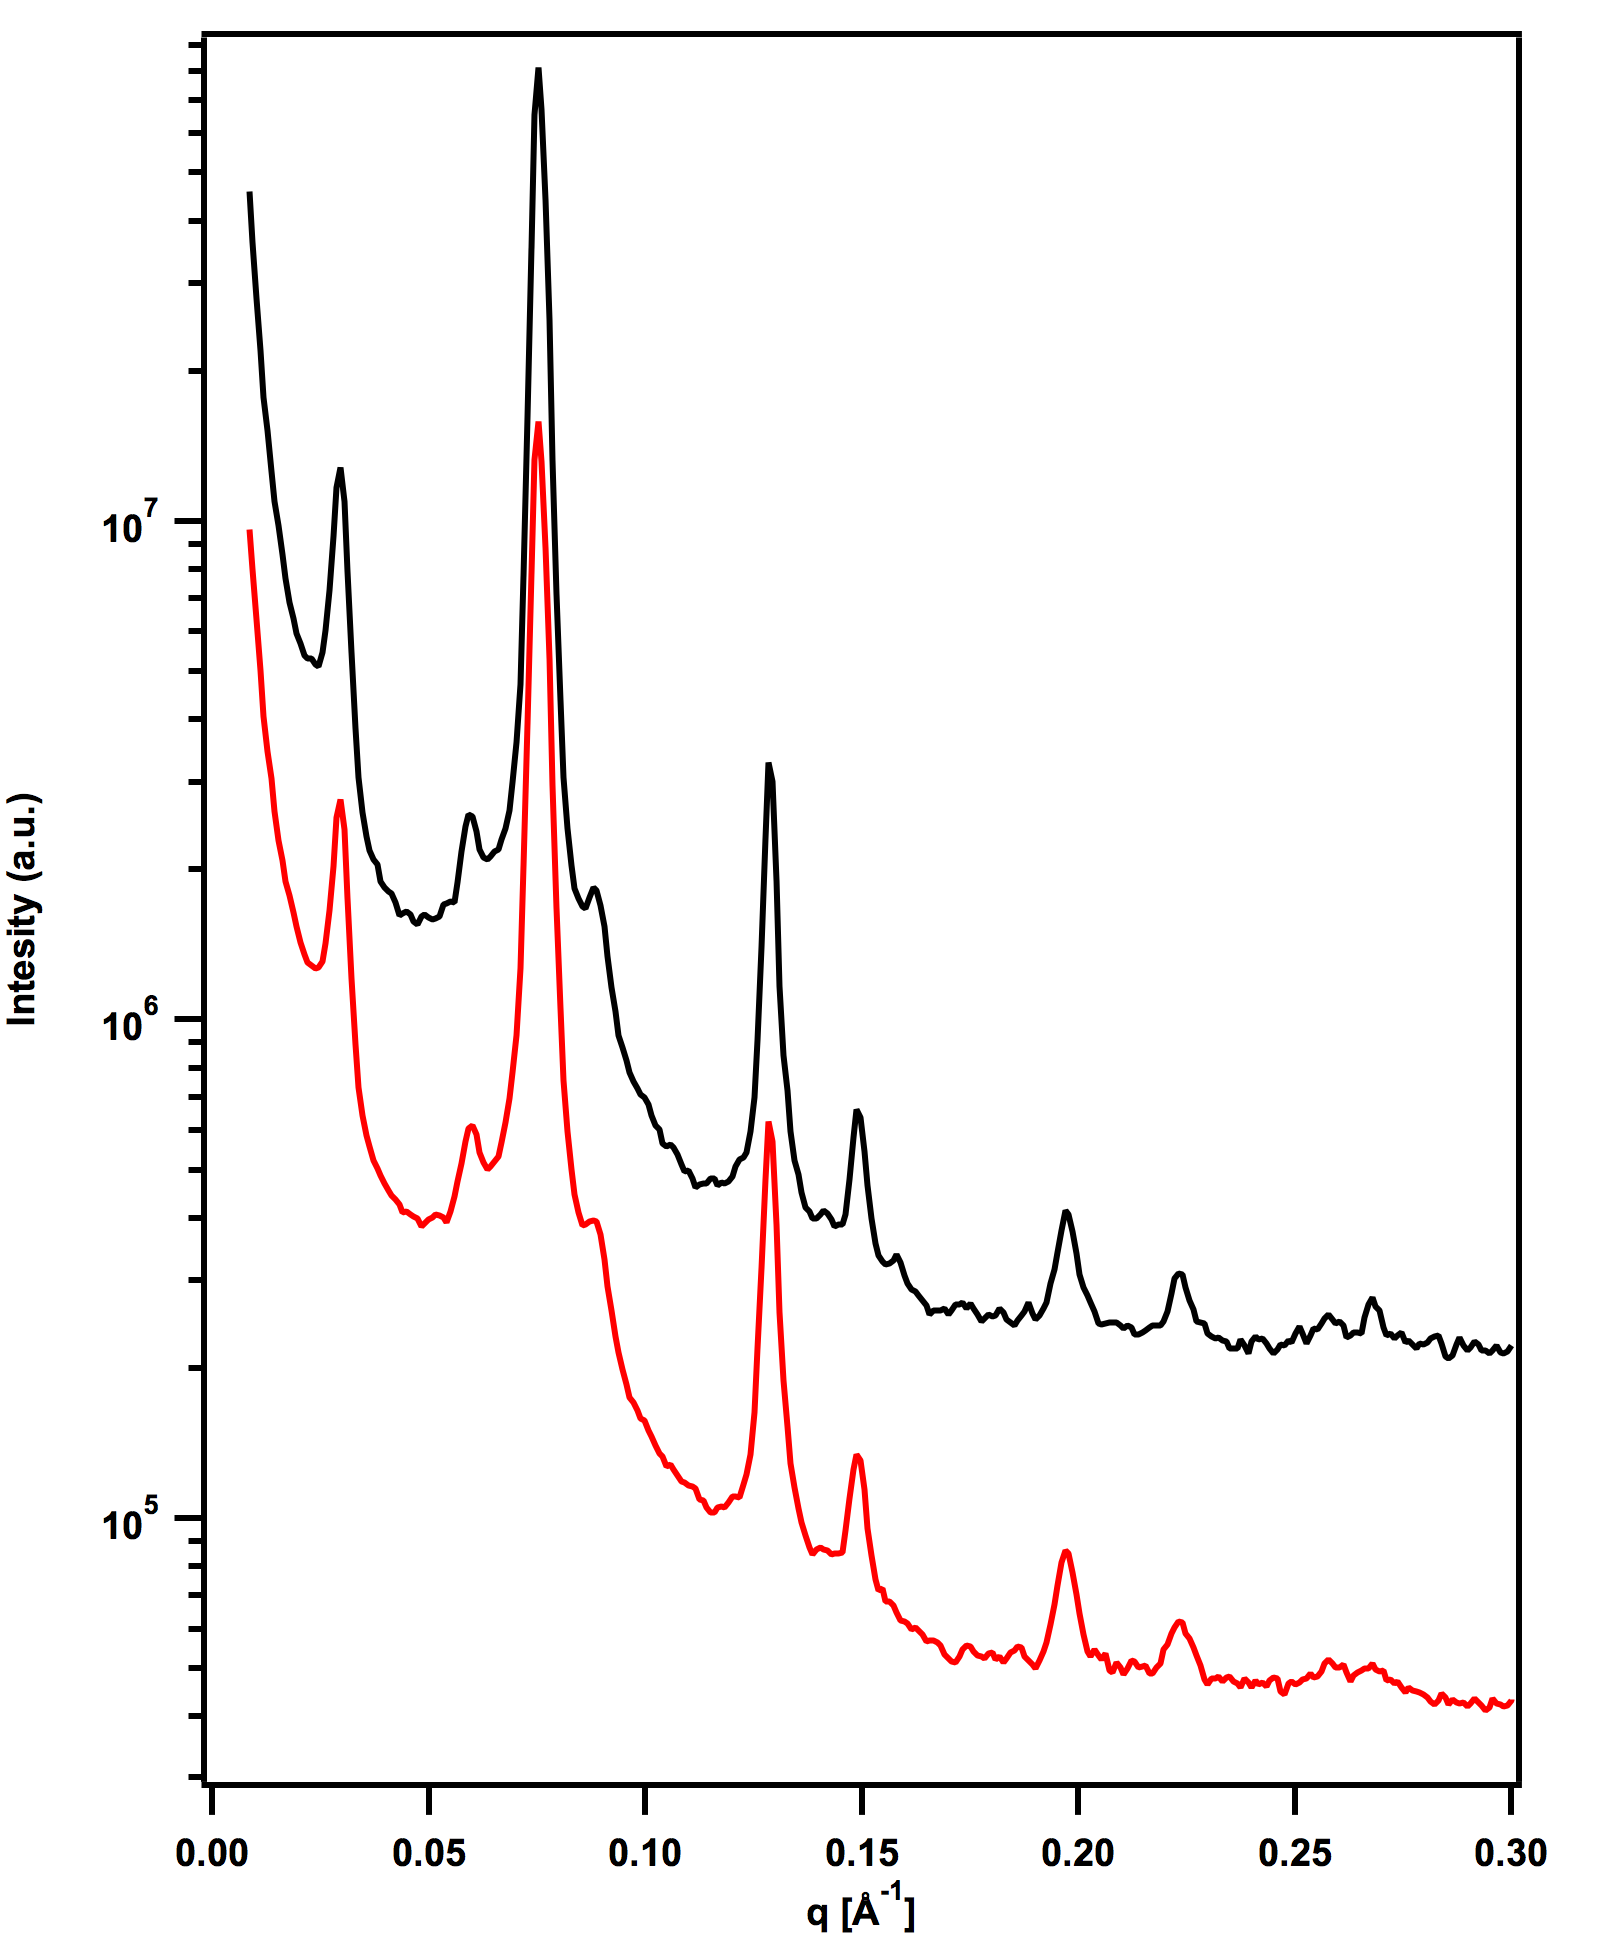
**

**Figure S5.** SAXS intensity plot acquired when drying proceeds from an initial solution of 18 nm long hydrophilic QRs, at 2.5 μM, which has been supplemented by Tween 20 at 96.4 µM. For comparison, data corresponding to are plotted in red.

**Table S1.** Influence of the ligand and solvent on the maximum intensity wavelength () and on the decay of fluorescence emission for 18 nm long QRs when dissolved in either toluene or water (see **Figure S8** for detailed experimental conditions and graphical data).Deconvolution of fluorescence emission decay curves by three exponentials yields, for each condition, three pre-exponential factors, , and three lifetimes, .

|  | (nm) | (%) | (ns) | (%) | (ns) | (%) | (ns) |
| --- | --- | --- | --- | --- | --- | --- | --- |
|  | 581 | 69 | 19.6 | 21 | 6.0 | 10 | 0.8 |
|  | 584 | 72 | 18.7 | 19 | 5.1 | 9 | 0.8 |

**Table S2.** Influence of the length of hydrophilic QRs on their fluorescence emission spectra when dissolved at in a drop of water placed on a coverslip (see **Figure S3** for detailed experimental conditions and graphical data). The maximum intensity wavelength for the whole spectra is denoted . Deconvolution of fluorescence emission spectra by three Gaussians yields, for each species, three peak areas, , and three maximum intensity wavelength, .

|  | (nm) | (%) | (nm) | (%) | (nm) | (%) | (nm) |
| --- | --- | --- | --- | --- | --- | --- | --- |
|  | 584 | 14.0 | 566 | 66.2 | 584 | 19.8 | 598 |
|  | 585 | 3.3 | 564 | 58.0 | 583 | 38.7 | 594 |

**Table S3.** Fullindexation for the SAXS intensity plot measured on sample (**Fig. 2f**). It corresponds to the smectic B crystal phase with an ABC hexagonal packing obtained when drying proceeds from a solution of 18 nm long hydrophilic QRs, at 2.5 μM. The series of peaks with a similar (h,k) are highlighted in gray. The unit cell parameter are *a* = 97.6 Å and *c* = 638 Å.

| (h, k, l) | h2+k2+hk | qth | qexp | Intensity(1) |
| --- | --- | --- | --- | --- |
| (0, 0, 3) | 0 | 0.0295 | 0.0295 | S |
| (0, 0, 6) | 0 | 0.059 | 0.0594 | S |
| (0, 0, 9) | 0 | 0.0884 | 0.0889 | S |
| (1, 0, 1) | 1 | 0.0750 | 0.0753 | VS |
| (1, 0, 7) | 1 | 0.1013 | 0.1000 | w |
| (1, 0, 8) | 1 | 0.1082 | 0.1080 | vw |
| (1, 1, 0) | 3 | 0.1287 | 0.1287 | VS |
| (1, 1, 6) | 3 | 0.1416 | 0.1411 | w |
| (1, 1, 9) | 3 | 0.1562 | 0.157 | w |
| (1, 1, 12) | 3 | 0.1746 | 0.175 | vw |
| (2, 0, 1) | 4 | 0.1490 | 0.1490 | S |
| (2, 1, 1) | 7 | 0.1969 | 0.1972 | S |
| (2, 1, 7) | 7 | 0.2083 | 0.2090 | W |
| (3, 0, 1) | 9 | 0.2229 | 0.2232 | S |
| (2,2,0) | 12 | 0.2574 | 0.2572 | S |
| (3,1,1) | 13 | 0.2681 | 0.2683 | S |
| (1) VS very strong, S strong, w weak, vw very weak | | | | |

**Table S4.** Fullindexation for the SAXS intensity plot measured on sample (**Fig. 2g**). It corresponds to the columnar nematic C phase obtained when drying proceeds from a solution of 40 nm long hydrophilic QRs, at 2.5 μM. The unit cell parameter is b = 99,7 Å.

| (h, k) | qth | qexp | Intensity(1) |
| --- | --- | --- | --- |
| (1, 0) | 0.0711 | 0.0727 | VS |
| (1, 1) | 0.1232 | 0.1251 | S |
| (2, 0) | 0.1422 | 0.1437 | w |
| (2, 1) | 0.1881 | 0.1919 | w |
| (3, 0) | 0.2133 | 0.2164 | w |
| (3, 1) | 0.2564 | 0.2493 | vw |
| (1) VS very strong, S strong, w weak, vw very weak | | | |

**References**

1. Carbone, L., et al., *Synthesis and micrometer-scale assembly of colloidal CdSe/CdS nanorods prepared by a seeded growth approach.* Nano Letters, 2007. **7**(10):2942-2950.

2. a) Alam, R., et al., *Designing quantum rods for optimized energy transfer with firefly luciferase enzymes.* Nano Letters, 2012. **12**(6): 3251-3256. b) Shaviv, E.; Salant, A.; Banin, U. ChemPhysChem, 2009. **10**: 1028-1031.

3. Lakowicz, J.R., Principles of Fluorescence spectroscopy. 2006: Springer.

4. Bizien, T., et al., *Peptidic ligands to control the three-dimensional self-assembly of quantum rods in aqueous media.* Small, 2014. **10**(18): 3707-3716.

5. David, G. and J. Perez, *Combined sampler robot and high-performance liquid chromatography: a fully automated system for biological small-angle X-ray scattering experiments at the Synchrotron SOLEIL SWING beamline.* Journal of Applied Crystallography, 2009. **42**(5): 892-900.

1. *corresponding authors: [valerie.marchi@univ-rennes1.fr](mailto:valerie.marchi@univ-rennes1.fr); [franck.artzner@univ-rennes1.fr](mailto:franck.artzner@univ-rennes1.fr) [↑](#footnote-ref-1)
